# Supplementary material for: Modulation of Coenzyme Q10 content and oxidative status in human dermal fibroblasts using HMG-CoA reductase inhibitor over a broad range of concentrations. From mitohormesis to mitochondrial dysfunction and accelerated aging
Source: publisher site journal article supplement (doi:10.18632/aging.101926), 2019-05-10
Supplement: Supplementary file [file aging-v11i9-101926-supplementary-material-SD1.pdf]

## SUPPLEMENTARY MATERIAL

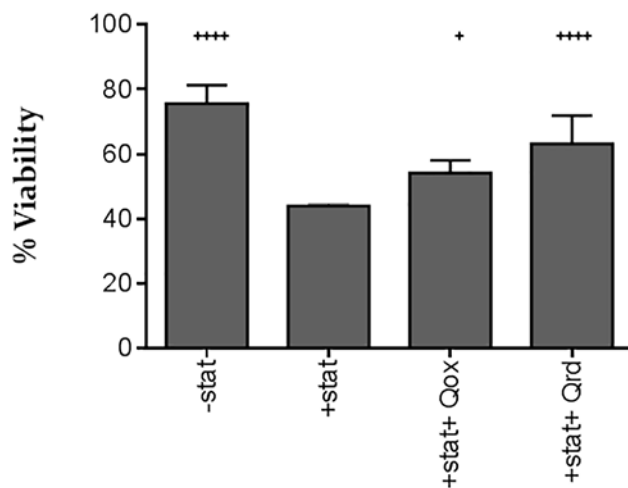

**Figure S1. Rescue of simvastatin-associated cytotoxicity by ubiquinone and ubiquinol supplementation.** Human dermal fibroblasts treated with simvastatin (20000 nM) alone or in presence of Coenzyme Q<sub>10</sub> (ubiquinone Qox; ubiquinol Qrd 10 µg/ml) for 72 h. Data (n=4) are reported as mean and standard error of % live cells. Significance difference vs +stat + p<0.05, ++ p<0.01, +++ p<0.001, \*\*\*\* p<0.0001.
